# Supplementary material for: The Genes Encoding Small Leucine-Rich Proteoglycans Undergo Differential Expression Alterations in Colorectal Cancer, Depending on Tumor Location
Source: MDPI journal article supplement (doi:10.3390/cells10082002), 2021-08-06
Supplement: s1 [file s1]

**Supplementary table S1**  
qRT-PCR primer sequences

| Gene          | Gene ID | Primer sequence                                                    |
|---------------|---------|--------------------------------------------------------------------|
| <i>LUM</i>    | 4060    | F 5'- TCACATGCCACACCACAAGA<br>R 5'- TGAGTGATACAAGAGCTGAAGGG        |
| <i>DCN</i>    | 1634    | F 5'- GGCTTCTTATTCGGGTGTGAGTC<br>R 5'- AGTTTCCGAGTTGAATGGCAGAG     |
| <i>KERA</i>   | 11081   | F 5'- GGTTCCCCGAATCAGTGCTC<br>R 5'- CGGAGGTAGCGAAGATGAGG           |
| <i>BGN</i>    | 633     | F 5'- GGTCTGAAGTCTGTGCCCAA<br>R 5'- GAGGTGCTGGAGACCCTTGA           |
| <i>OGN</i>    | 4969    | F 5'- CCACAGTCAGCAGGCCACTA<br>R 5'- GATAATGCGTGAGTCCTGCTG          |
| <i>ASPN</i>   | 54829   | F 5'- CTCAGTCCCAACCAACATTCCA<br>R 5'- TGTTGTTGTTTCAGGATCAGACCA     |
| <i>ECM2</i>   | 1842    | F 5'- CAAGTCTGGAGCTCACTGGC<br>R 5'- ATGCTTTTGGACCTATGCCTGA         |
| <i>FMOD</i>   | 2331    | F 5'- AGCAGCCTCCTTGAGCTAGA<br>R 5'- AAGTTCACGACGTCCACCAC           |
| <i>PRELP</i>  | 5549    | F 5'- GCCATCAACAACAGGCTGGA<br>R 5'- CCAGGTCCGAGGAGAAGTCA           |
| <i>EPYC</i>   | 1833    | F 5'- GGGGCCACACACAAATGAAGA<br>R 5'- TTTGGCAGCGGAGGAATAGC          |
| <i>OPTC</i>   | 26254   | F 5'- CCCCACGATGACCAGACCTA<br>R 5'- TACACAGAGGAACCGAGGCA           |
| <i>TSK</i>    | 25987   | F 5'- GACAACCCGGCCATGCTTC<br>R 5'- CGCTACAATCCACCCGAGTC            |
| <i>CHAD</i>   | 1101    | F 5'- CAAGTTCAAGGGCCAGCACA<br>R 5'- TAGTCTCTCCGGTGGAAGGC           |
| <i>NYX</i>    | 60506   | F 5'- GTGACCTGTCCTTTCTCCCCT<br>R 5'- GGACCACCGCATGCAGAAG           |
| <i>PODN</i>   | 127435  | F 5'- CCCGAGTCACTTGAGTACCTGTA<br>R 5'- AGCCAGCTTGTTAAACCTGAGAA     |
| <i>PODNL1</i> | 79883   | F 5'- TCGAGTGTTCCCGGACAACA<br>R 5'- GGGACAGCTCATTGTAGGGGA          |
| <i>OMD</i>    | 4958    | F 5'- CCCCTGAAAACATAAGCAAATTGAACA<br>R 5'- CTGGCTCTTGGTCATAGTCTTCA |

**The genes encoding small leucine-rich proteoglycans undergo differential expression alterations in colorectal cancer, depending on tumor location**

International Journal of Colorectal Disease

M.P. Solis-Hernandez, B. García, N. Pérez-López, Y. García-Mesa, S. González-Fernández, O. García-Suárez, J. Merayo, C. Martín, I. Fernández-Vega, L.M. Quirós

Luis M. Quirós. Department of Functional Biology, University of Oviedo, Oviedo, Spain. Email: [quiros-luis@uniovi.es](mailto:quiros-luis@uniovi.es)

Iván Fernández-Vega. Department of Surgery and Medical-surgical Specialties, University of Oviedo, Oviedo, Spain Email: [fernandezvivan@uniovi.es](mailto:fernandezvivan@uniovi.es)
