# Supplementary material for: The Genes Encoding Small Leucine-Rich Proteoglycans Undergo Differential Expression Alterations in Colorectal Cancer, Depending on Tumor Location
Source: MDPI journal article supplement (doi:10.3390/cells10082002), 2021-08-06
Supplement: s1 [file s1]

Supplementary figure legends:

Figure S1: Relapse Free Survival in SLRPs with differences in their expression pattern. **(A)** Kaplan-Meier curves for Relapse Free Survival. Only PODN showed statistically significant differences. **(B)** Forest Plot for Cox Regression model for SRLPs displaying alterations. PODN appears as a protection factor when underexpressed.

Figure S2: Progression Free Survival in SLRPs with differences in their expression pattern. **(A)** Kaplan-Meier curves for Progression Free Survival. Only PODN showed statistically significant differences. **(B)** Forest Plot for Cox Regression model displaying no statistically differences for the SLRPs in PFS.
