# Supplementary material for: The Genes Encoding Small Leucine-Rich Proteoglycans Undergo Differential Expression Alterations in Colorectal Cancer, Depending on Tumor Location
Source: MDPI journal article supplement (doi:10.3390/cells10082002), 2021-08-06
Supplement: s1 [file s1]

## Supplementary table S2

Relationship between alteration in gene expression and survival data

### Univariate analysis for RFS and PFS

|                             |                                  | RFS       |           |                  |              |                            | PFS       |           |                  |       |                      |
|-----------------------------|----------------------------------|-----------|-----------|------------------|--------------|----------------------------|-----------|-----------|------------------|-------|----------------------|
|                             |                                  | n         | Events    | Median<br>months | p            | HR (95%CI)                 | n         | Events    | Median<br>months | p     | HR (95%CI)           |
| <b>All Patients</b>         |                                  | <b>25</b> | <b>14</b> | <b>27.30</b>     |              |                            | <b>32</b> | <b>21</b> | <b>21.87</b>     |       |                      |
| <b>PTL</b>                  | RSCC*                            | 7         | 3         | 40.03*           | 0.953        | 0.962 (0.267-3.464)        | 12        | 7         | 17.20            | 0.669 | 1.104 (0.701-1.740)  |
|                             | LSCC <sup>§</sup>                | 18        | 11        | 21.43            |              |                            | 20        | 14        | 19.47*           |       |                      |
| <b>Age</b>                  | <65 years old                    | 9         | 7         | 14.20            | <b>0.072</b> | 0.375 (0.129-1.091)        | 12        | 10        | 14.20            | 0.281 | 0.623 (0.262-1.483)  |
|                             | ≥65 years old * <sup>§</sup>     | 16        | 7         | 40.30            |              |                            | 20        | 11        | 27.30            |       |                      |
| <b>BGN</b>                  | No overexpression* <sup>§</sup>  | 8         | 3         | NR               | 0.207        | 1,514 (0,795-2,882)        | 11        | 6         | 21,53            | 0.560 | 1,153 (0,714-1,862)  |
|                             | Overexpression                   | 17        | 11        | 16.93            |              |                            | 21        | 15        | 21,87            |       |                      |
| <b>OGN</b>                  | No underexpression               | 10        | 7         | 16.93            | 0.352        | 0,606 (0,211-1,739)        | 13        | 10        | 21,53            | 0,771 | 0,877 (0,363-2,119)  |
|                             | Underexpression* <sup>§</sup>    | 15        | 7         | 40.03            |              |                            | 19        | 11        | 21,87            |       |                      |
| <b>CHAD</b><br><i>n=17</i>  | No underexpression               | 2         | 1         | 14.20            | 0.763        | 1,372 (0,175-10,757)       | 4         | 3         | 12,00            | 0.549 | 0,672 (0,183-2,464)  |
|                             | Underexpression* <sup>§</sup>    | 15        | 8         | 21.43            |              |                            | 16        | 11        | 21,53            |       |                      |
| <b>PRELP</b><br><i>n=17</i> | No underexpression* <sup>§</sup> | 5         | 3         | 19.47            | 0.950        | 0,958 (0,254-3,619)        | 6         | 4         | 12,00            | 0.959 | 0,970 (0,303-3,106)  |
|                             | Underexpression                  | 12        | 8         | 21.43            |              |                            | 14        | 10        | 21,43            |       |                      |
| <b>PODN</b><br><i>n=17</i>  | No underexpression               | 6         | 5         | 12.23            | <b>0.45</b>  | <b>0.289 (0.086-0.975)</b> | 7         | 6         | 12,00            | 0.246 | 0,533 (0,1840-1,545) |
|                             | Underexpression* <sup>§</sup>    | 11        | 6         | 27.30            |              |                            | 13        | 8         | 21,53            |       |                      |

*n=25 patients after R0 resection (complete resection of primary ± metastasis) at diagnosis.*

*NR: not reached*

*\* indicates better RFS*

*§ indicates better PFS*
