# Supplementary material for: The Genes Encoding Small Leucine-Rich Proteoglycans Undergo Differential Expression Alterations in Colorectal Cancer, Depending on Tumor Location
Source: Cells. 2021 Aug 6;10(8):2002. doi: 10.3390/cells10082002 (PMC8391422; doi:10.3390/cells10082002)
Supplement: Supplementary file 1 [file cells-10-02002-s001.zip]

Archive with 5 entries (5 files):
- Supplementary figure legends.pdf
- Supplementary figure S1.pdf
- Supplementary figure S2.pdf
- Supplementary table S1.pdf
- Supplementary table S2.pdf
