# Supplementary figures and images for: The Genes Encoding Small Leucine-Rich Proteoglycans Undergo Differential Expression Alterations in Colorectal Cancer, Depending on Tumor Location
Source: MDPI journal article supplement (doi:10.3390/cells10082002), 2021-08-06

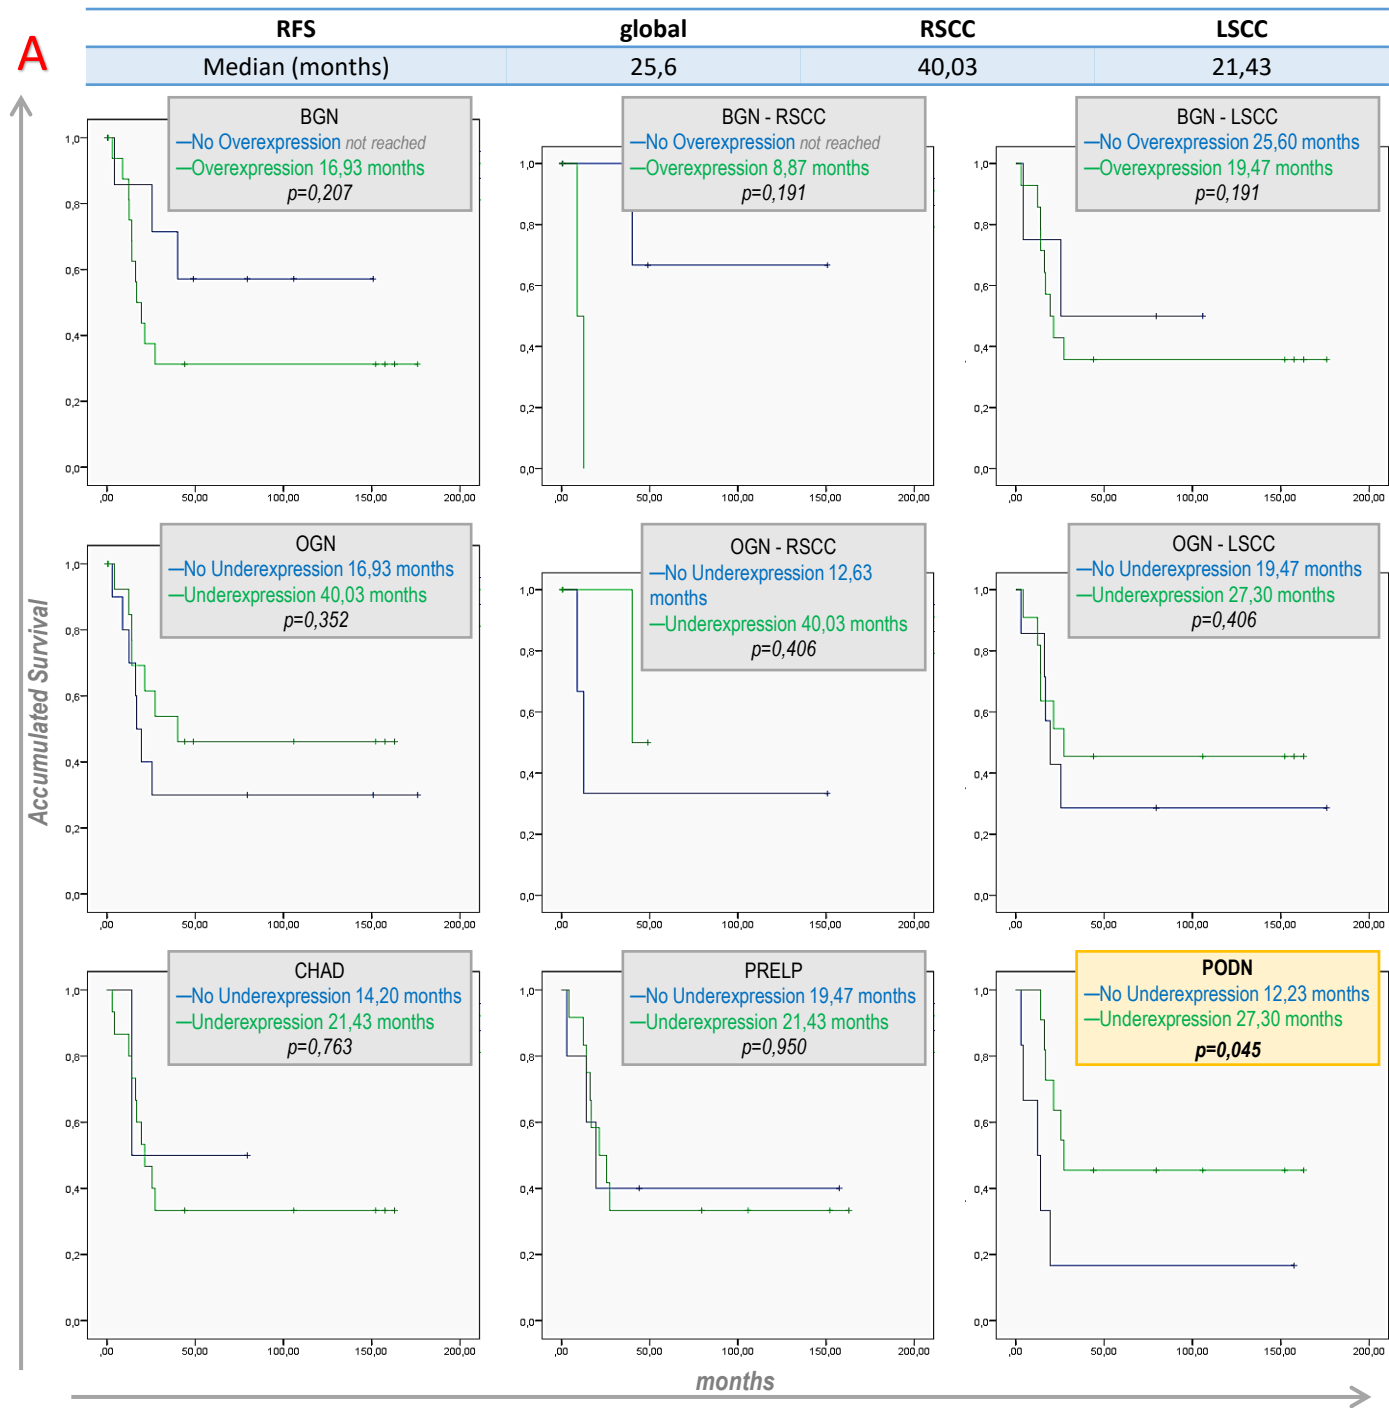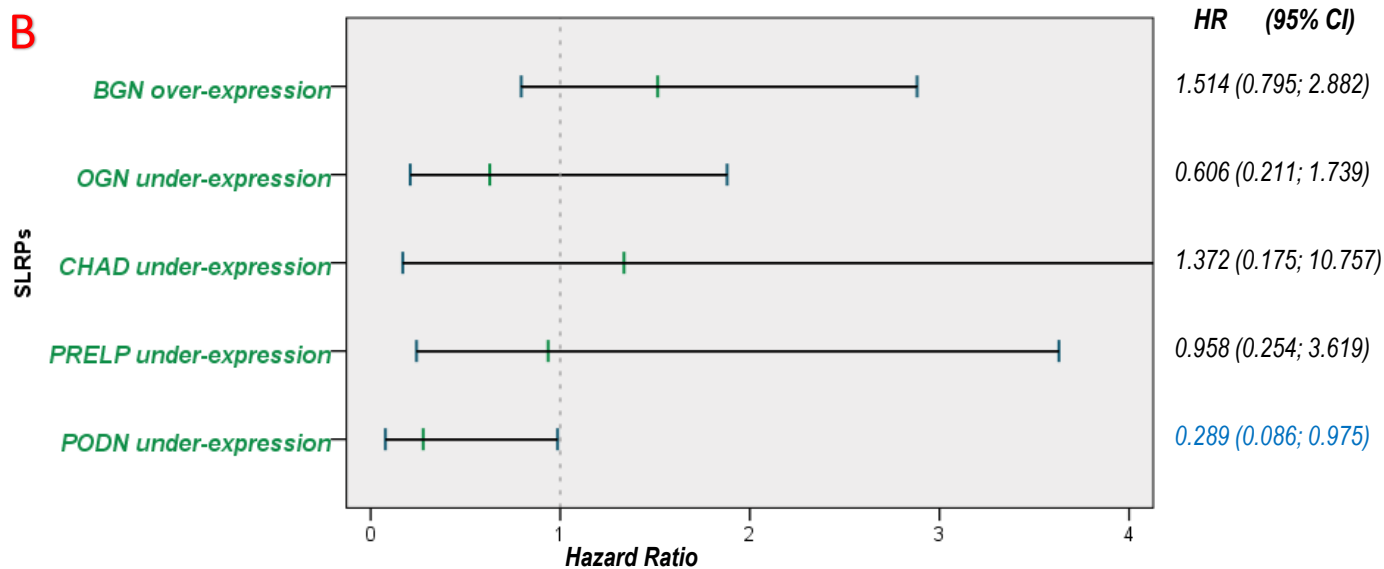

Supplement: s1 [file s1]

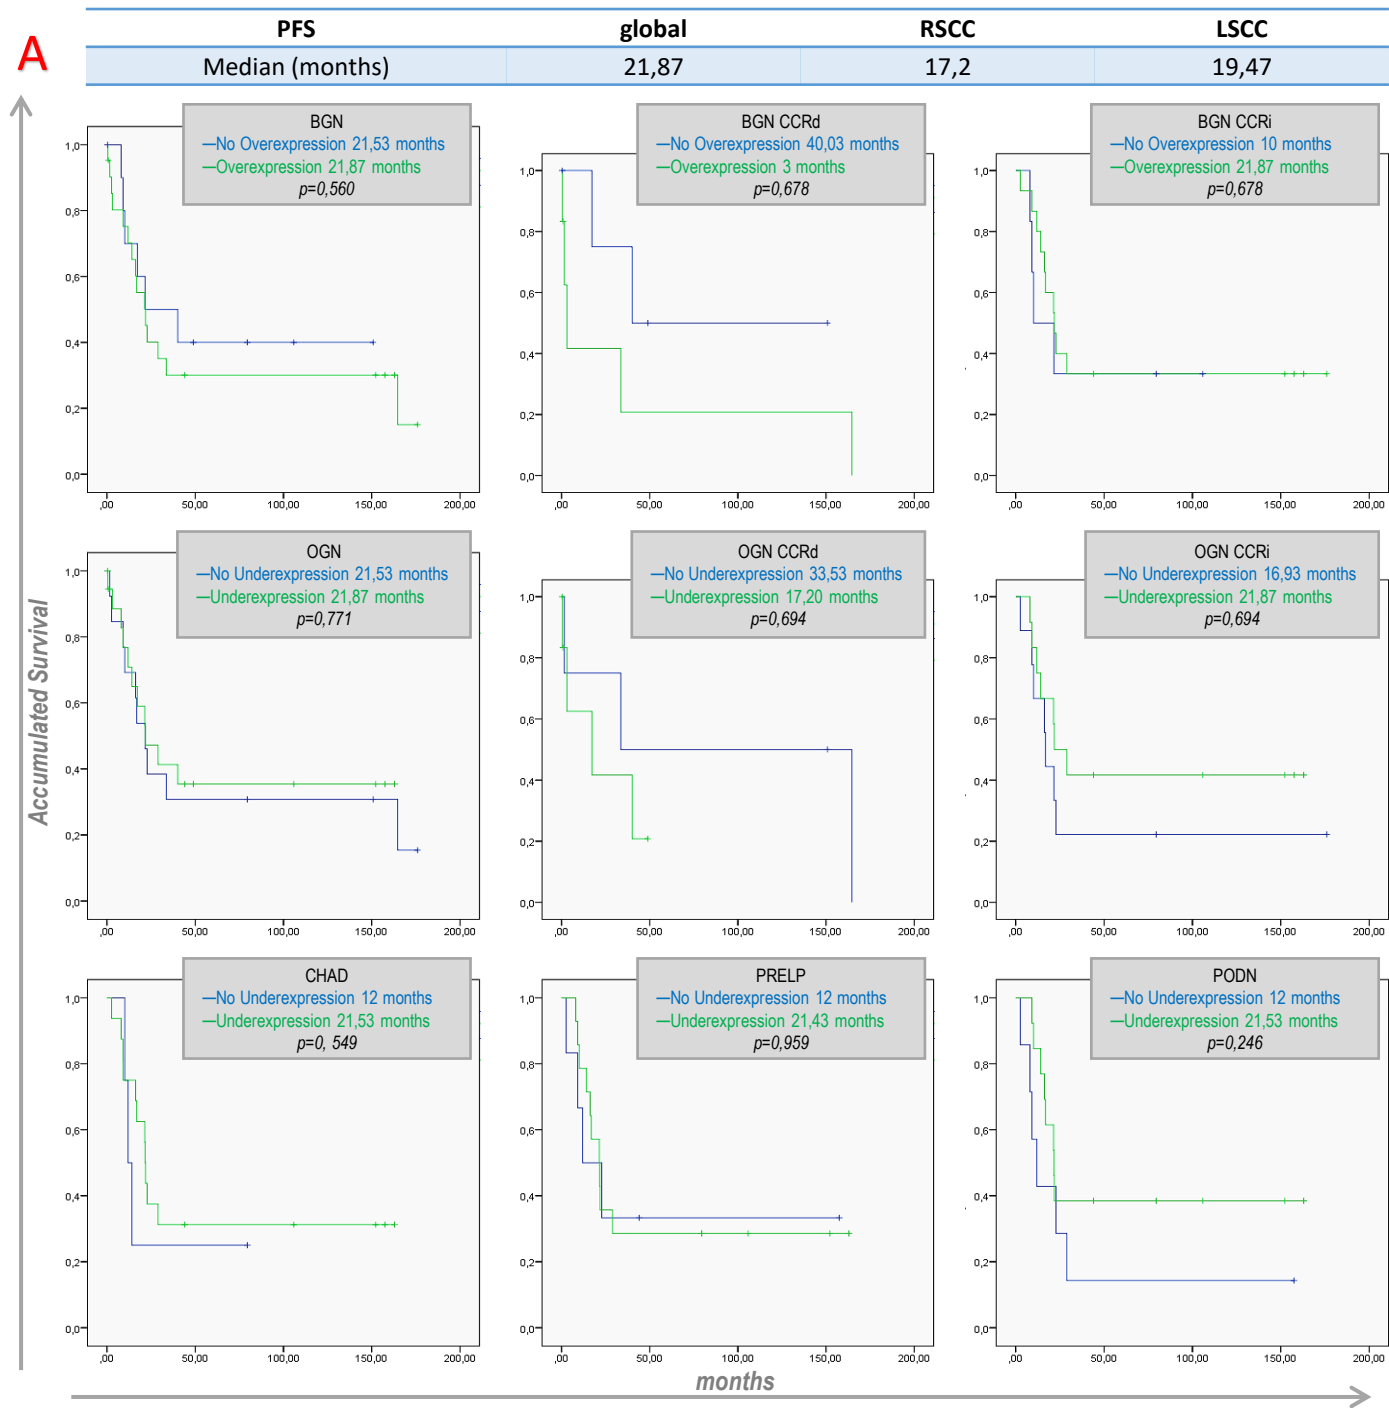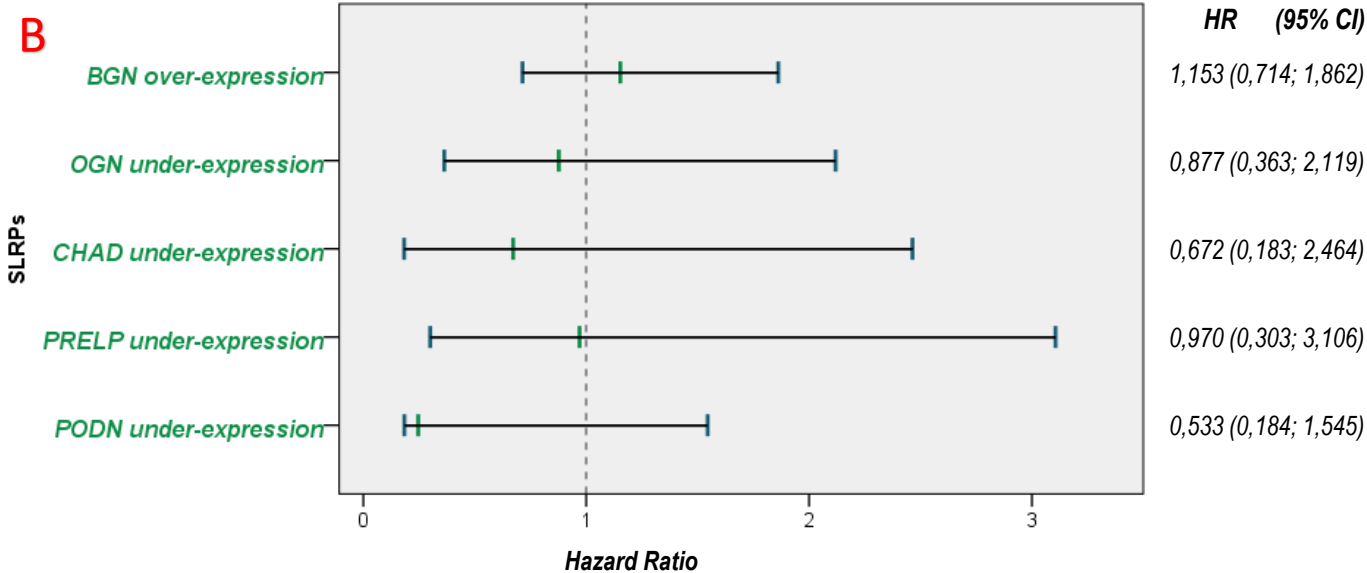

Supplement: s1 [file s1]
